# Supplementary material for: Disease associated mutations in mitochondrial precursor tRNAs affect binding, m1R9 methylation and tRNA processing by mtRNase P
Source: bioRxiv or medRxiv preprint supplement (doi:10.1101/2020.07.07.191726), 2020-07-07
Supplement: Supplementary file [file media-1.pdf]

## Supplemental Material

### Disease associated mutations in mitochondrial precursor tRNAs affect binding, m1R9 methylation and tRNA processing by mtRNase P

Agnes Karasik<sup>1</sup>, Carol A. Fierke<sup>2</sup>, Markos Koutmos<sup>3\*</sup>

<sup>1</sup>Department of Biochemistry and Molecular Biology, Uniformed Services University of the Health Sciences, Bethesda, MD, 20814, USA

<sup>2</sup>Department of Chemistry, Department of Biological Chemistry, University of Michigan, Ann Arbor, MI 48109, USA

<sup>3</sup>Department of Chemistry, Program in Biophysics, University of Michigan, Ann Arbor, MI, 48109, USA

**Supplemental Table 1.** Melting temperature values for first transitions for wild type (mt)pre-tRNAs and (mt)pre-tRNA<sup>Ile</sup> mutants.

| human mitochondrial pre-tRNA     | T <sub>m</sub> 1 (°C) | T <sub>m</sub> 2 (°C) |
|----------------------------------|-----------------------|-----------------------|
| (mt)pre-tRNA <sup>Leu(UUR)</sup> | 28.7 ± 0.1            | -                     |
| (mt)pre-tRNA <sup>Met</sup>      | 32.6 ± 1.1            |                       |
| (mt)pre-tRNA <sup>Ile</sup>      | 47.7 ± 1.6            |                       |
| A4269G                           | 40.4 ± 5.4            | 49.3 ± 1.0            |
| A4317G                           | 42.5 ± 0.9            | 56.2 ± 0.5            |
| C4320T                           | 27.7 ± 3.7            | 47.5 ± 0.4            |

Supplemental Figure 1.

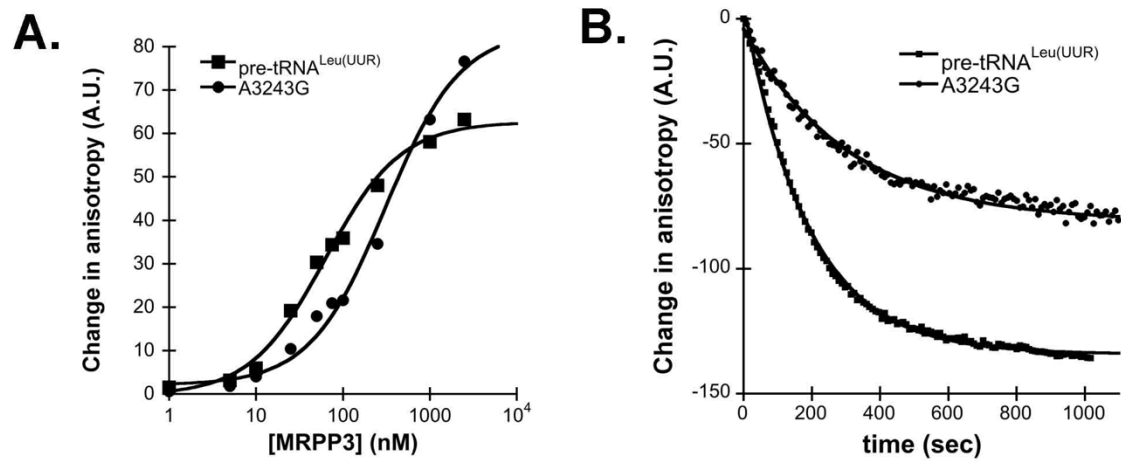

Supplemental Figure 1. A. Example of a wild type and a mutant (mt)pre-tRNA binding in the function of MRPP3 concentrations when 150 nM MRPP1/2 is present using standard binding assay conditions. B. Example of the single turnover cleavage of a wild type and a mutant (mt)pre-tRNA using standard cleavage assay conditions.

Supplemental Figure 2.

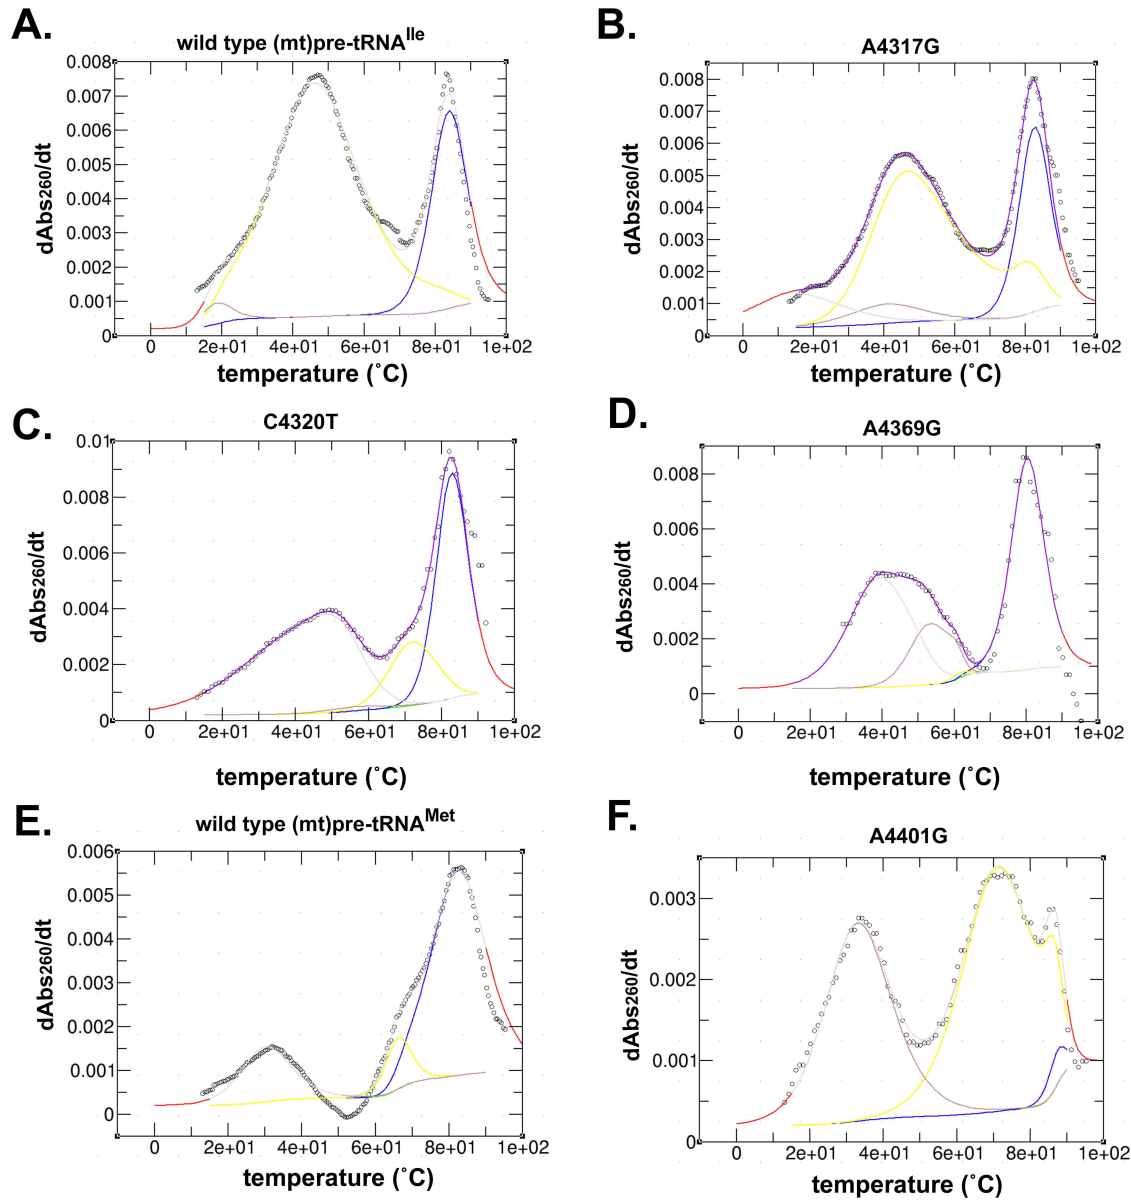

Supplemental Figure 2. Examples of fitting data from UV melting experiments by fitUVData.py and Global Melt Fit [33, 34] for different (mt)pre-tRNAs.
